# Supplementary material for: Two Alimentary Canal Proteins, Fo-GN and Fo-Cyp1, Act in Western Flower Thrips, Frankliniella occidentalis TSWV Infection
Source: MDPI journal article supplement (doi:10.3390/insects14020154), 2023-02-03
Supplement: s1 [file s1]

**Table S1.** Primers used in this study

| Genes               | Sequence (5'-3')            | Uses    | Annealing temperature (°C) | Expected size (bp) |
|---------------------|-----------------------------|---------|----------------------------|--------------------|
| Cyclophilin         | GCGATGTTGTCCCCAAGACT        | RT-PCR  | 52.0                       | 191                |
|                     | CTGGAAGTTCTCGTCAGCGA        | RT-qPCR |                            |                    |
| T7+ Cyclophilin     | TAATACGACTCACTATAGGGAG      | RNAi    | 52.0                       | 237                |
|                     | GCGATGTTGTCCCCAAGACT        |         |                            |                    |
|                     | TAATACGACTCACTATAGGGAG      |         |                            |                    |
|                     | CTGGAAGTTCTCGTCAGCGA        |         |                            |                    |
| Glycoprotein        | GTCAAGTCCGTCCCCCAGTA        | RT-PCR  | 55.0                       | 312                |
|                     | GTCGAACTCCTGAACCTGGC        | RT-qPCR |                            |                    |
| T7+ Glycoprotein    | TAATACGACTCACTATAGGGAG      | RNAi    | 55.0                       | 358                |
|                     | GTCAAGTCCGTCCCCCAGTA        |         |                            |                    |
|                     | TAATACGACTCACTATAGGGAG      |         |                            |                    |
|                     | GTCGAACTCCTGAACCTGGC        |         |                            |                    |
| Elongation Factor 1 | TCA AGG AAC TGC GTC GTG GAT | RT-qPCR | 52.0                       | 160                |
|                     | ACA GGG GTG TAG CCG TTA GAG |         |                            |                    |
